# Supplementary material
Source: MDPI journal article supplement (https://www.mdpi.com/2076-3298/9/2/20)
Supplement: s1 [file s1 › environments-1547012-supplementary.pdf]

Supplementary

# Dissolution of Silver Nanoparticles in Stratified Estuarine Mesocosms and Silver Accumulation in a Simple Planktonic Freshwater Trophic Chain

Camille Guilleux <sup>1</sup>, Zhongzhi Chen <sup>2</sup>, Peter G. C. Campbell <sup>1</sup> and Claude Fortin <sup>1,\*</sup>

<sup>1</sup> Centre Eau Terre et Environnement, Institut national de la Recherche scientifique, 490 rue de la Couronne, Québec, QC, G1K 9A9, Canada; camille.guilleux@inrs.ca (C.G.); peter.campbell@inrs.ca (P.G.C.C.)

<sup>2</sup> InnoTech Alberta, P.O Box 4000, Hwy 16A & 75 Street, Vegreville, AB, T9C 1T4, Canada; zhongzhi.chen@innotechalberta.ca

\* Correspondence: claudie.fortin@inrs.ca

**Citation:** Guilleux, C.; Chen, Z.; Campbell, P.G.C.; Fortin, C. Dissolution of Silver Nanoparticles in Stratified Estuarine Mesocosms and Silver Accumulation in a Simple Planktonic Freshwater Trophic Chain. *Environments* **2022**, *9*, 20. <https://doi.org/10.3390/environments9020020>

Academic Editor(s): Nicholas S. Fisher

Received: 23 December 2021

Accepted: 25 January 2022

Published: 28 January 2022

**Publisher's Note:** MDPI stays neutral with regard to jurisdictional claims in published maps and institutional affiliations.

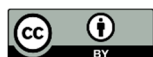

**Copyright:** © 2022 by the authors. Submitted for possible open access publication under the terms and conditions of the Creative Commons Attribution (CC BY) license (<https://creativecommons.org/licenses/by/4.0/>).

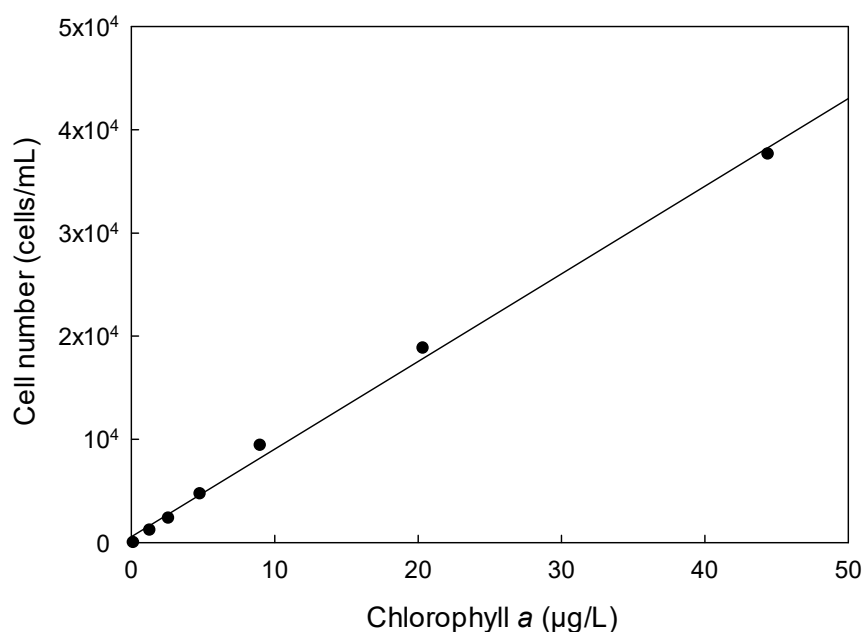

**Figure S1.** Relationship between Chlorophyll *a* concentration and *Chlamydomonas reinhardtii* cell number in mesocosm 1 (control) surface water.

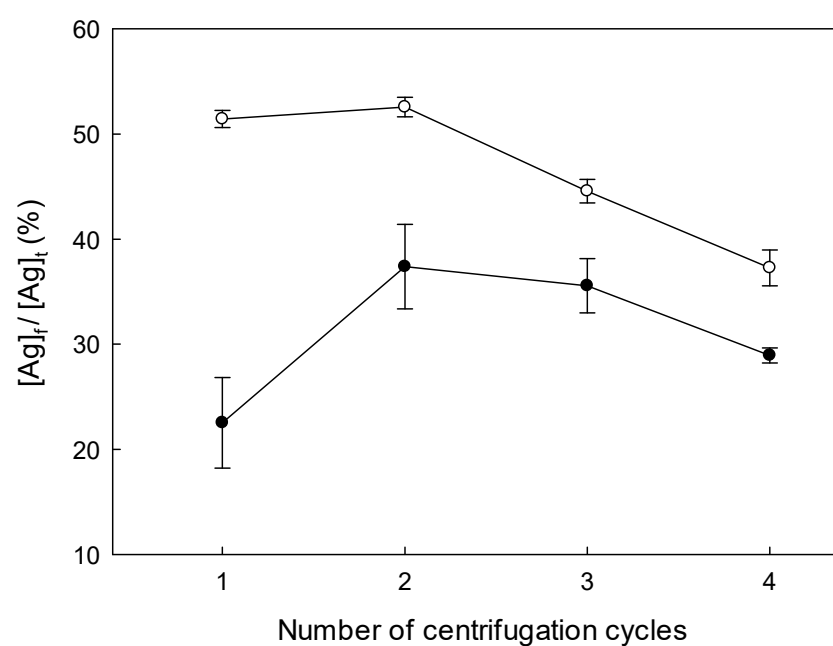

**Figure S2.** Mean proportion of silver in the ultrafiltrate ( $[Ag]_f$ ) measured for up to 4 centrifugation cycles at total silver ( $[Ag]_t$ ) concentration of 85.8 (●) and 145 ng/L (○) with 4.5 mL at 3700× g for 20 min. Error bars represent the standard deviation of three replicates.

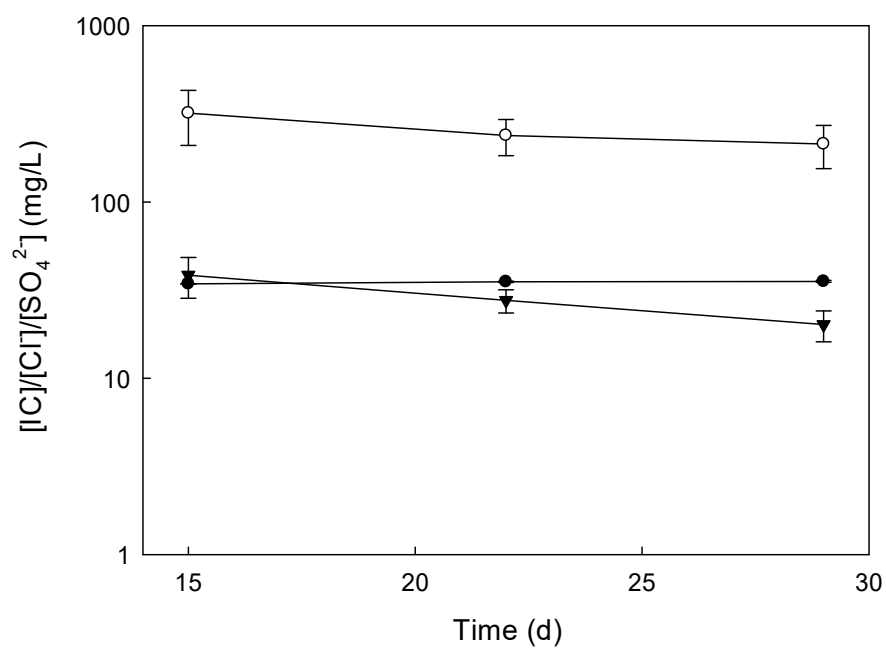

**Figure S3.** Mean concentrations of inorganic carbon (IC, ●), Cl<sup>-</sup> (○) and SO<sub>4</sub><sup>2-</sup> (▼) in the three mesocosms as a function of time. Error bars represent the standard deviation of concentrations (IC, Cl<sup>-</sup>, SO<sub>4</sub><sup>2-</sup>) from mesocosms 1, 2 and 3 ( $n = 3$ ; one measurement per mesocosm).

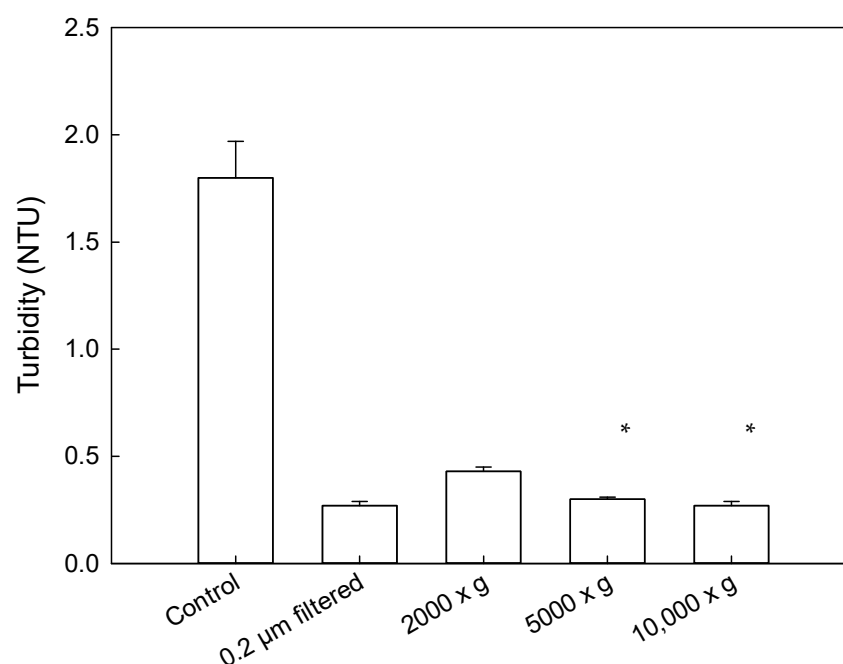

**Figure S4.** Turbidity of supernatant from water of mesocosms 1, 2 and 3 after centrifugation (15 min) or filtration (0.2 µm polycarbonate filter). Turbidity is expressed as Nephelometric turbidity units (NTU). Error bars represent the standard deviation of turbidity measurements on samples from the three mesocosms; one sample was tested from each mesocosm. Asterisks (\*) indicate there was no significant difference with respect to the 0.2 µm filtered solution (Student's t-test,  $p > 0.05$ ).

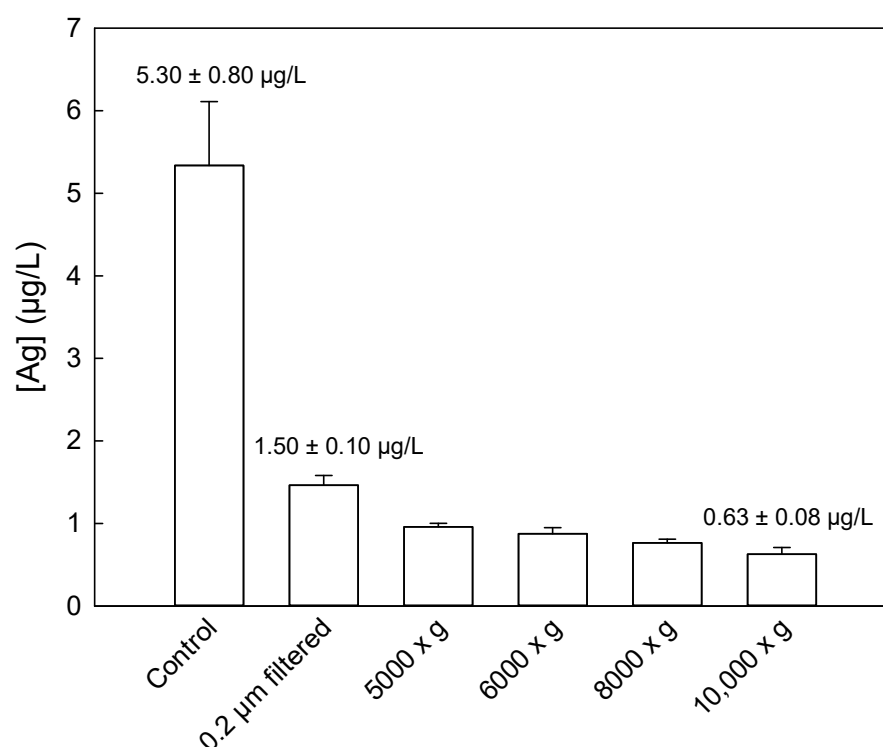

**Figure S5.** Ag concentrations in mesocosms 2 and 3 at the beginning of the experiments (no filtration or centrifugation; labeled "control"), compared with Ag concentrations in the filtrate after passing through 0.2 µm polycarbonate filters, as well as Ag concentrations in the supernatants after centrifugation for 15 min at different speeds ( $g$ -values). Error bars represent the standard deviation of Ag concentrations from mesocosms 2 and 3 ( $n = 2$ ; one sample per mesocosm).

**Table S1.** Composition of culture medium (MHSM-1). All reagents were of analytical grade or better.

| Stock solution<br>(filtered, 0.2 µm) | Product                                                | Final concentration<br>(M) | Supplier      |
|--------------------------------------|--------------------------------------------------------|----------------------------|---------------|
| MOPS (100 mM)                        | MOPS                                                   | $1.00 \times 10^{-3}$      | Sigma Aldrich |
| Ammonium #2                          | NH <sub>4</sub> NO <sub>3</sub>                        | $9.37 \times 10^{-4}$      | Fisher        |
|                                      | MgSO <sub>4</sub> , 7 H <sub>2</sub> O                 | $8.12 \times 10^{-5}$      | Caledon       |
|                                      | Ca(NO <sub>3</sub> ) <sub>2</sub> , 4 H <sub>2</sub> O | $6.80 \times 10^{-5}$      | Sigma Aldrich |
| Phosphate #2                         | KH <sub>2</sub> PO <sub>4</sub>                        | $5.44 \times 10^{-5}$      | EMD           |
|                                      | K <sub>2</sub> HPO <sub>4</sub>                        | $8.27 \times 10^{-5}$      | EMD           |
| KNO <sub>3</sub> (1 M)               | KNO <sub>3</sub>                                       | $4.00 \times 10^{-3}$      | EMD           |
| NaOH (1 M)                           | NaOH                                                   | $4.25 \times 10^{-3}$      | Fisher        |
| AAP (algal assay<br>procedure)       | H <sub>3</sub> BO <sub>3</sub>                         | $3.01 \times 10^{-6}$      | Sigma Aldrich |
|                                      | MnCl <sub>2</sub> , 4 H <sub>2</sub> O                 | $2.10 \times 10^{-6}$      | Fisher        |
|                                      | FeCl <sub>3</sub> , 6 H <sub>2</sub> O                 | $5.92 \times 10^{-7}$      | Sigma Aldrich |
|                                      | Na <sub>2</sub> EDTA, 2 H <sub>2</sub> O               | $8.02 \times 10^{-7}$      | Sigma Aldrich |
|                                      | Zn (1 g/L)                                             | $2.43 \times 10^{-8}$      | SCP Science   |
|                                      | Co (1 g/L)                                             | $1.09 \times 10^{-8}$      | SCP Science   |
|                                      | Mo (1 g/L)                                             | $3.00 \times 10^{-8}$      | SCP Science   |
|                                      | Cu (1 g/L)                                             | $7.03 \times 10^{-11}$     | SCP Science   |
